# Supplementary material
Source: PubMed Central journal article supplement (PMC3494075)

Communication between host organism and cancer cells is transduced by systemic sphingosine kinase 1/sphingosine 1-phosphate signaling to regulate tumor metastasis

Suriyan Ponnusamy, Shanmugam Panneer Selvam, Shikhar Mehrotra, Toshihiko Kawamori, Ashley J. Snider, Lina M. Obeid, Yuan Shao, Roger Sabbadini, and Besim Ogretmen

### Supporting Information Table of Contents

|                                       |         |
|---------------------------------------|---------|
| Supporting Information Figure Legends | pp. 1-2 |
| Supporting Information Figure 1       | pp. 3   |
| Supporting Information Figure 2       | pp. 4   |
| Supporting Information Figure 3       | pp. 5   |
| Supporting Information Figure 4       | pp. 6   |

## Supporting information figure legends

**Figure S1. Effects of genetic loss of SK1 on systemic Sph and dhSph in SK1<sup>-/-</sup> versus WT mice.** (A-B) Sph (A) and dhSph (B) were measured in serum obtained from WT versus SK1<sup>-/-</sup> mice using LC/MS/MS. Data, obtained from duplicates at least in two independent trials, are represented as mean  $\pm$  SEM. Error bars represent standard deviations.  $P < 0.05$  (\*) was considered significant.

**Figure S2. Loss of systemic SK1 inhibits lung colonization/metastasis of B16 melanoma cells in SK1<sup>-/-</sup> versus WT mice.** Effects of systemic SK1 loss on lung colonization/metastasis of B16 melanoma cells were measured in WT and SK1<sup>-/-</sup> mice (n=3/group). Data are represented as mean  $\pm$  SEM. Error bars represent standard deviations.  $P < 0.05$  (\*) was considered significant.

**Figure S3. Effects of systemic loss of SK1 on expression of genes involved in the regulation of metastasis in MB49-derived lung tumors obtained from SK1<sup>-/-</sup> versus WT mice.** Expression of 84 genes involved in the regulation of metastasis was measured using the Super Array Mouse Tumor Metastasis by Q-PCR in MB49-derived tumors obtained from SK1<sup>-/-</sup> compared to WT control mice. List of gene names and their relative expression in lung tumors of SK1<sup>-/-</sup> mice compared to WT controls are presented.

**Figure S4. Effects of S1PR2 inhibition on Brms1 expression.** (A) Effects of FTY720 versus JTE013 treatment on *BRMS1* mRNA at various concentrations, 10-100 nM for 24

h were measured by Q-PCR in A549 human lung adenocarcinoma cells (beta-actin was used as normalization control). (B) *Brms1* mRNA was measured using Q-PCR in response to S1PR2 inhibition in response to JTE013 treatment in MB49 cells (normalized to rRNA). (C) Efficiency of siRNA-mediated knock-down of *Brms1* mRNA compared to control Scr siRNAs at 100 nM was measured using Q-PCR. (D) Effects of neutralizing S1P by Sphingomab (0.2-1  $\mu$ M) in WT and S1PR2<sup>-/-</sup> MEFs grown in control media were measured using Q-PCR compared to IgG-treated controls. Data, obtained from duplicates at least in two independent trials are represented as mean  $\pm$  SEM. Error bars represent standard deviations. P <0.05 (\*) was considered significant.

# Supplementary Figure S1

**A**

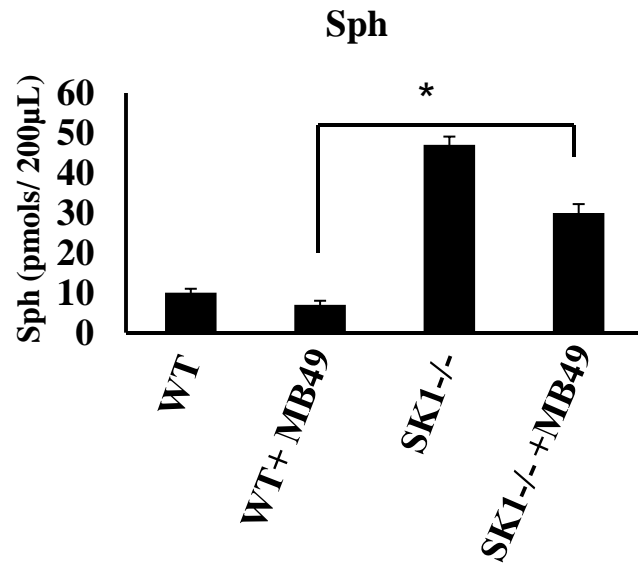

**B**

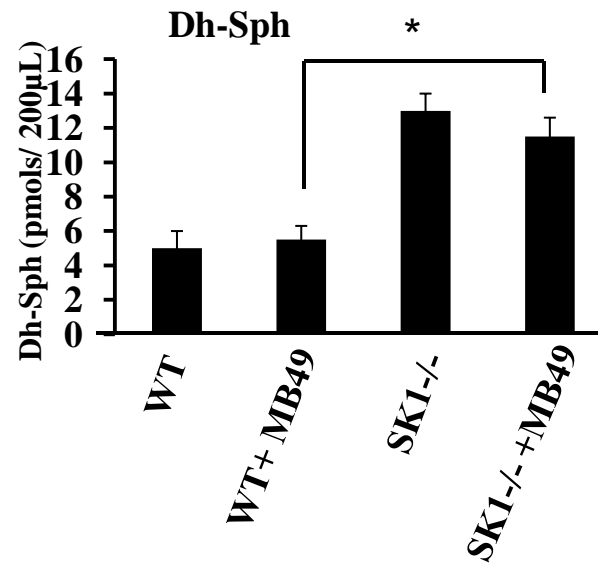

# Supplementary Figure S2

**B16 melanoma cell-  
induced lung tumors**

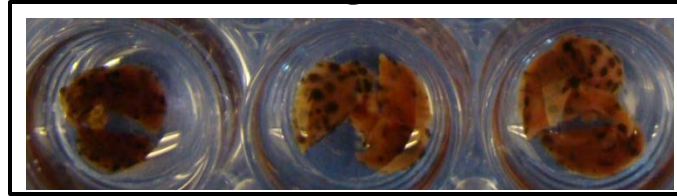

**WT mice lung  
tissue**

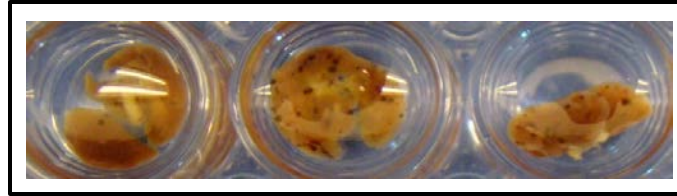

**SK1-/- mice lung  
tissue**

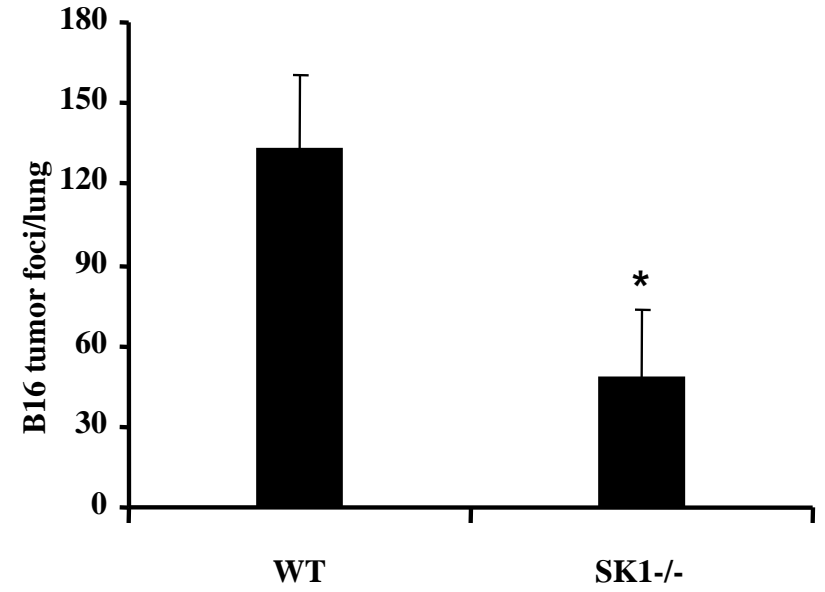

# Supplementary Figure S3

## Pathway specific Super array for Mouse Tumor Metastasis

|                             |                              |                             |                              |                              |                              |                             |                             |                                |                               |                              |                             |
|-----------------------------|------------------------------|-----------------------------|------------------------------|------------------------------|------------------------------|-----------------------------|-----------------------------|--------------------------------|-------------------------------|------------------------------|-----------------------------|
| <b>Apc</b><br><b>0.1</b>    | <b>Brms1</b><br><b>8.99</b>  | <b>Ccl7</b><br><b>1.01</b>  | <b>Cd44</b><br><b>1.0</b>    | <b>Cdh1</b><br><b>1.11</b>   | <b>Cdh11</b><br><b>0.87</b>  | <b>Cdh6</b><br><b>0.79</b>  | <b>Cdh8</b><br><b>0.10</b>  | <b>Cdkn2a</b><br><b>0</b>      | <b>Chd4</b><br><b>-0.23</b>   | <b>Col4a2</b><br><b>0.59</b> | <b>Csf1</b><br><b>1.27</b>  |
| <b>Ctbp1</b><br><b>0.09</b> | <b>Ctnna1</b><br><b>-1.6</b> | <b>Ctsk</b><br><b>0.45</b>  | <b>Ctsl</b><br><b>-0.98</b>  | <b>Cxcl12</b><br><b>0.79</b> | <b>Cxcr4</b><br><b>0.77</b>  | <b>Denr</b><br><b>1.17</b>  | <b>Ela2</b><br><b>2.1</b>   | <b>Ephb2</b><br><b>1.9</b>     | <b>Etv4</b><br><b>1.09</b>    | <b>Ewsr1</b><br><b>-0.92</b> | <b>Fat1</b><br><b>0.24</b>  |
| <b>Fgfr4</b><br><b>1.19</b> | <b>Flt4</b><br><b>1.67</b>   | <b>Fn1</b><br><b>0.0</b>    | <b>Fxyd5</b><br><b>1.0</b>   | <b>Gpnmb</b><br><b>0.5</b>   | <b>Kiss1r</b><br><b>1.56</b> | <b>Hgf</b><br><b>2.7</b>    | <b>Hpse</b><br><b>0.19</b>  | <b>Hras1</b><br><b>1.21</b>    | <b>Htatip2</b><br><b>0.19</b> | <b>Igf1</b><br><b>-2.0</b>   | <b>Il18</b><br><b>0.12</b>  |
| <b>Il1b</b><br><b>0.0</b>   | <b>Il8rb</b><br><b>1.27</b>  | <b>Itga7</b><br><b>0.06</b> | <b>Itgb3</b><br><b>0.23</b>  | <b>Cd82</b><br><b>1.24</b>   | <b>Kiss1</b><br><b>1.1</b>   | <b>Kras</b><br><b>1.45</b>  | <b>Rpsa</b><br><b>0.18</b>  | <b>Mycl1</b><br><b>-0.92</b>   | <b>Mcam</b><br><b>0.75</b>    | <b>Mdm2</b><br><b>4.8</b>    | <b>Met</b><br><b>2.1</b>    |
| <b>Mmp10</b><br><b>3.4</b>  | <b>Mmp11</b><br><b>-0.19</b> | <b>Mmp13</b><br><b>1.18</b> | <b>Mmp2</b><br><b>1.0</b>    | <b>Mmp3</b><br><b>-2.9</b>   | <b>Mmp7</b><br><b>1.87</b>   | <b>Mmp9</b><br><b>1.09</b>  | <b>Mta1</b><br><b>0.98</b>  | <b>Mtss1</b><br><b>-1.56</b>   | <b>Myc</b><br><b>0.87</b>     | <b>Nf2</b><br><b>0.46</b>    | <b>Nme1</b><br><b>1.29</b>  |
| <b>Nme2</b><br><b>-0.58</b> | <b>Nme4</b><br><b>-1.2</b>   | <b>Nr4a3</b><br><b>0.87</b> | <b>P2ry5</b><br><b>-0.94</b> | <b>Plaur</b><br><b>0.69</b>  | <b>Pnn</b><br><b>-2.18</b>   | <b>Pten</b><br><b>0.38</b>  | <b>Rb1</b><br><b>0.90</b>   | <b>Rorb</b><br><b>0.37</b>     | <b>Set</b><br><b>2.49</b>     | <b>Smad2</b><br><b>1.11</b>  | <b>Smad4</b><br><b>2.27</b> |
| <b>Src</b><br><b>1.01</b>   | <b>Sstr2</b><br><b>2.41</b>  | <b>Syk</b><br><b>-0.93</b>  | <b>Tcf20</b><br><b>0.57</b>  | <b>Tgfb1</b><br><b>1.07</b>  | <b>Timp2</b><br><b>0.08</b>  | <b>Timp3</b><br><b>0.39</b> | <b>Timp4</b><br><b>2.34</b> | <b>Tnfsf10</b><br><b>-0.91</b> | <b>Trp53</b><br><b>2.0</b>    | <b>Tshr</b><br><b>0.88</b>   | <b>Vegfa</b><br><b>1.09</b> |

# Supplementary Figure S4

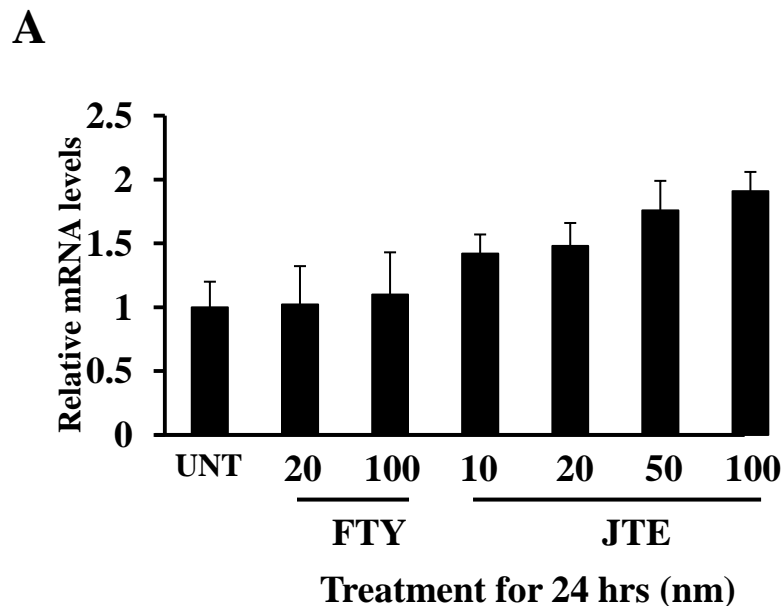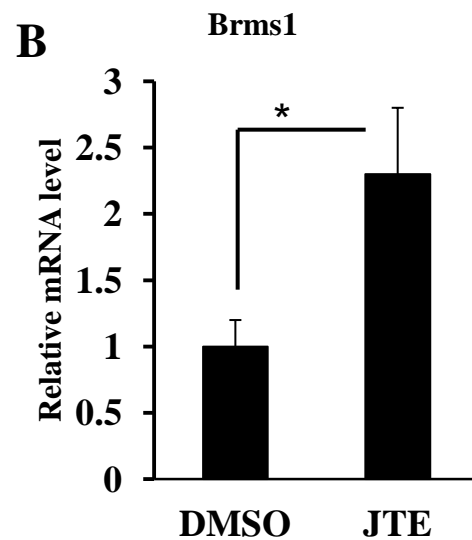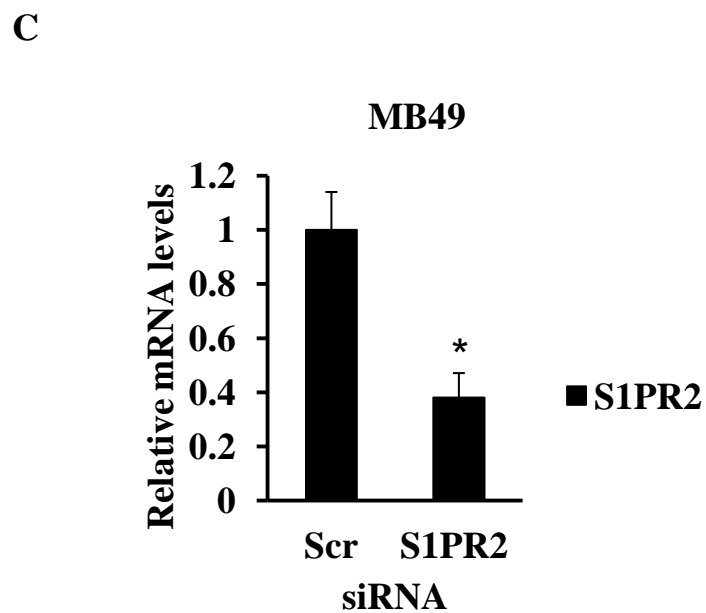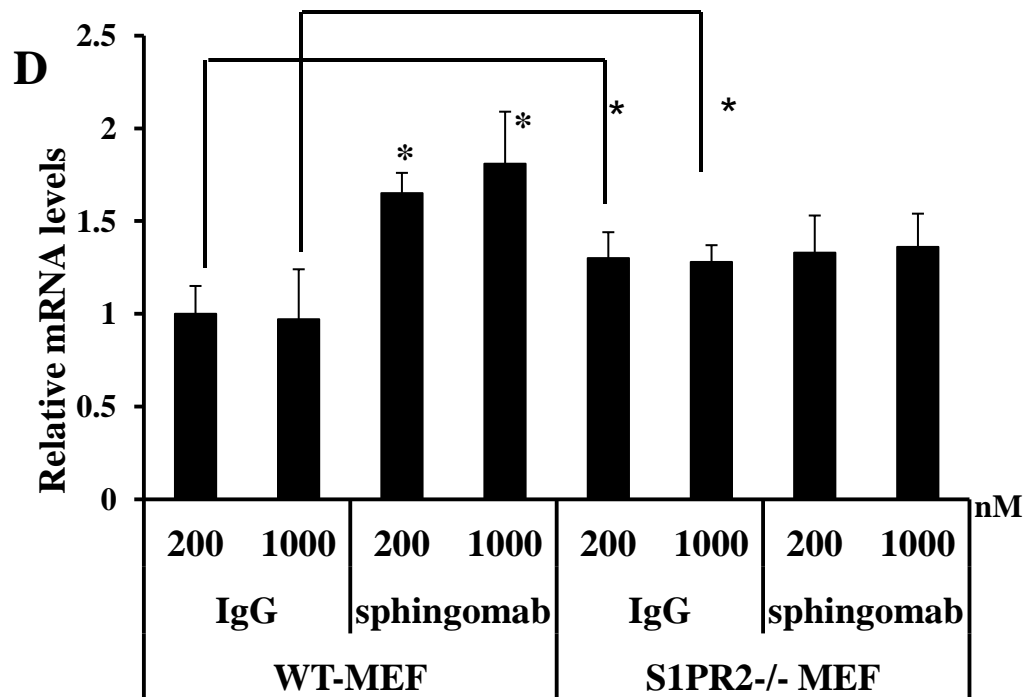

Supplement: emmm0004-0761-SD2.pdf [file emmm0004-0761-SD2.pdf]
